# 1 Is there a sex difference in mortality rates in 2 Paediatric Intensive Care Units: A Systematic Review

3 Ofran Almassawi<sup>1</sup> Amanda Friend<sup>2</sup> Luigi Palla<sup>3,4</sup> Richard G. Feltbower<sup>5</sup>  
4 Sofia Sardo-Infiri<sup>6</sup> Scott O'Brien<sup>7</sup> Katie Harron<sup>1</sup> Simon Nadel<sup>7</sup>  
5 Bianca De Stavola<sup>1</sup>

6 <sup>1</sup> Population, Policy and Practice Research and Teaching Department, UCL, UK

7 <sup>2</sup> Department of Paediatric Oncology, Birmingham Children's Hospital, UK

8 <sup>3</sup> Department of Public Health and Infectious Diseases, University of Rome La Sapienza, Rome, Italy

9 <sup>4</sup> Nagasaki University Institute of Tropical Medicine, Japan

10 <sup>5</sup> Leeds Institute for Data Analytics, School of Medicine, University of Leeds, UK

11 <sup>6</sup> Department of Medical Statistics, The Royal Marsden Hospital, UK

12 <sup>7</sup> Children's Services, Imperial Healthcare NHS Trust, UK

13 \* Corresponding author [o.almassawi@ucl.ac.uk](mailto:o.almassawi@ucl.ac.uk)

14 Great Ormond Street Institute of Child Health,

15 30 Guilford Street,

16 London, WC1N 1EH, UK

## 17 Abstract

19 **Introduction:** Mortality rates in infancy and childhood are lower in females  
20 than males. However, for children admitted to Paediatric Intensive Care Units  
21 (PICU), mortality has been reported to be lower in males, although males have  
22 higher admission rates. This female mortality excess for the subgroup of children  
23 admitted in intensive care is not well understood. To address this, we carried out a  
24 systematic literature review to summarise the available evidence.

25 Our review studies the differences in mortality between males and females aged 0  
26 to <18 years, while in a PICU, to examine whether there was a clear difference (in  
27 either direction) in PICU mortality between the two sexes, and, if present, to  
28 describe the magnitude and direction of this difference.

29 **Methods and analysis:** Any studies that directly or indirectly reported the rates of  
30 mortality in children admitted to intensive care by sex were eligible for inclusion.  
31 The search strings were based on terms related to the population (those admitted  
32 into a paediatric intensive care unit), the exposure (sex), and the outcome  
33 (mortality). We used the search databases MEDLINE, Embase, and Web of Science  
34 as these cover relevant clinical publications. We assessed the reliability of included  
35 studies using a modified version of the risk of bias in observational studies of  
36 exposures (ROBINS-E) tool. We considered estimating a pooled effect if there were  
37 at least three studies with similar populations, periods of follow-up while in PICU,  
38 and adjustment variables.

39 **Results:** We identified 124 studies of which 114 reported counts of deaths by  
40 males and females which gave a population of 278,274 children for analysis,  
41

42 involving 121,800 (44%) females and 156,474 males (56%). The number of  
43 deaths and mortality rate for females were 5,614 (4.61%), and for males  
44 6,828 (4.36%). In the pooled analysis, the odds ratio of female to male  
45 mortality was 1.06 [1.01 to 1.11] for the fixed effect model, and 1.10 [1.00 to  
46 1.21] for the random effects model.

47  
48 **Conclusion:** Overall, males have a higher admission rate to PCU, and a lower overall  
49 mortality in PICU.

50  
51 **Systematic review registration:** PROSPERO database reference number  
52 CRD42020203009.

53 **Keywords:** Child; Critical Care; Paediatric Intensive Care; Intensive Care; Mortality;  
54 Sex Differences

## 55 **1 Introduction**

56 Child mortality is a global measure of a nation's health and a top priority for the UK  
57 health system<sup>1</sup>. Differences in child mortality rates between the sexes are well  
58 documented in almost all developed countries, showing higher female survival rates than  
59 males<sup>2</sup>. Overall childhood mortality is very low in the UK, and in other developed  
60 countries (United Nations Inter-agency Group for Child Mortality Estimation (2021)).  
61 Office for National Statistics (ONS) figures show downward mortality trends in the UK  
62 for both males and females since the 1950's, and levelling off since 2010.

63 Paediatric Intensive Care Unit (PICU) deaths account for about 15% of all UK childhood  
64 fatalities<sup>3</sup> and 86% of UK hospital deaths<sup>4</sup> thus provide a sizeable population to study  
65 childhood deaths. This led to the design and implementation of a longitudinal study of all  
66 infants admitted to UK PICUs over 11 years, which showed a higher PICU mortality rate  
67 for female over male infants<sup>5</sup>. This difference is in the opposite direction to that seen in  
68 the overall population and could be due to differences in severity of disease on  
69 admission, despite both sexes having the same mean and median Paediatric Index of  
70 Mortality (PIM2), a proxy for severity of disease at the time of admission and mortality  
71 risk score. There are a number of published studies showing similar conclusions but  
72 there is no published systematic review which has collated and evaluated all the  
73 available evidence.

74 The aim of this systematic review was to study the differences in mortality, in either  
75 direction, between males and females from age 0 to <18 years, where the death event  
76 happens in PICU. This review is also part of a wider project using linked PICU and  
77 Hospital Episode Statistics (HES) data which aims to study differences in sex mortality  
78 and long term outcomes in England<sup>6</sup>.

79

## 80 **1.1 Aims and Objectives**

81 Using published data, our primary aim is to estimate the difference in mortality rates  
82 between males and females who die in PICU. This is to identify if male or female sex is  
83 associated with differences in mortality rates in PICU.

84 Our secondary aim is to quantify the rates of admission to PICU for males and females.

85

86 Our specific objectives are to report on the evidence with regards to:

- 87 • The difference (absolute or relative, as available) in sex mortality in PICU for all  
88 children aged 0 to any age <18 years, overall and separately by age groups
- 89 • The rates of admission to PICU for all children aged 0 to any age <18 years by  
90 sex
- 91 • The evidence summarised overall and by any primary diagnostic groups (sub-  
92 populations of PICU)

## 93 **1.2 Review Question**

- 94 • **Population** Children of any age range <18 years old, and admitted to a  
95 Paediatric Intensive Care Unit
- 96 • **Exposure** Sex
- 97 • **Comparison** Comparing male and female mortality rates and their rates of  
98 admission to PICU
- 99 • **Outcome** Death within a Paediatric Intensive Care Unit

## 100 **2 Methods**

101 Our protocol was reported previously<sup>7</sup> using the Preferred Reporting Items for  
102 Systematic Reviews and Meta-Analyses Protocols (PRISMA-P) guidelines<sup>8</sup> and  
103 registered with the International prospective register of systematic reviews  
104 (PROSPERO) database, reference number CRD42020203009.

### 105 **2.1 Information sources and search Strategy**

106 We conducted a systematic search of PubMed, Embase, and Web of Science using a  
107 controlled vocabulary (MeSH) and keywords, without date or language limitations. Our  
108 last search update was on 20th of December 2020 and our peer reviewed search strategy  
109 was described in the protocol and is reported in [Appendix 1 \(Search Terms and Search  
110 Results\)](#).

111 We identified any studies that addressed the association between sex and PICU mortality  
112 in children, where sex was the primary exposure. Additionally, we identified all studies

113 where PICU mortality was reported by sex, or where sex was used as a variable for  
114 statistical adjustment in the estimation of mortality rates in PICU. We did report but did  
115 not pool any estimate reported if sex was a variable for adjustment. This was to ensure  
116 we avoided the 'Table 2 fallacy', where effect estimates for any of the adjustment  
117 variables included in a regression model alongside the main exposure variable cannot be  
118 interpreted<sup>9</sup>.

119 The search strings were based on terms related to the population (children in intensive  
120 care), the exposure (sex), and the outcome (in-PICU mortality).

121

## 122 **2.2 Study Outcomes**

123 The primary outcome is mortality in PICU by sex. Secondary outcomes are rates of  
124 admission to PICU, and length of stay in PICU, by sex.

## 125 **2.3 Eligibility and inclusion criteria**

126 Eligibility and inclusions criteria are presented in Table 1.

127 We included any observational study, clinical trial, or re-analysis of a clinical trial.

128 Table 1: The study eligibility criteria following the Population Exposure  
129 Comparison and Outcome model

| <b>PECO</b> | <b>Inclusion Criteria</b>                                                                                               | <b>Exclusion Criteria</b>                                                                                                                                                                                                                                 |
|-------------|-------------------------------------------------------------------------------------------------------------------------|-----------------------------------------------------------------------------------------------------------------------------------------------------------------------------------------------------------------------------------------------------------|
| Population  | Children 0 to any age <18 years admitted to PICU                                                                        | Studies with premature neonates or focusing on Very Low Birth Weight infants<br>Studies exclusive to neonatal intensive care<br>Studies with mixed adult and paediatric populations where the paediatric results are not separable from the adult results |
| Exposure    | Sex used as a primary exposure for mortality<br>Sex reported as a summary statistic or used as covariate for adjustment | Sex not used as a grouping variable for mortality<br>Sex as primary exposure or covariate for adjustment in the analysis of non-mortality outcomes                                                                                                        |
| Comparison  | Comparing male to female mortality                                                                                      | Comparing categories of variables other than sex                                                                                                                                                                                                          |
| Outcomes    | Primary: Mortality in PICU                                                                                              | Mortality in PICU not reported                                                                                                                                                                                                                            |

130

## 131 **2.4 Study exclusion criteria**

132 After the eligibility screening, we further scrutinised studies for any of the exclusion  
133 criteria listed in Table 1, and some additional criteria listed below.

134 Studies meeting at least one of the exclusion criteria were excluded as detailed in the full  
135 PRISMA flow diagram in Figures 2a and 2b. Specifically, we excluded:

- 136 • Studies that were only published in abstract form, or were review articles.
- 137 • Potentially, studies not available in English, depending on the *a priori*  
138 specification to exclude non-English language studies if they comprised less  
139 than 20% of the full text records.

## 140 **2.5 Study screening mode**

### 141 **Screening studies: title and abstract screening**

142 One reviewer screened the titles and abstracts of records after deduplication, and a  
143 second reviewer independently checked all the studies from this stage that were labelled  
144 'yes' and 'maybe' and a sample of the ones labelled as 'no'. The 'no' sample was assigned  
145 to be twice the number of the 'yes' total. A third reviewer resolved any disagreements. If  
146 all three reviewers gave different answers (Yes/No/Maybe) then the study was included.

### 147 **Screening studies: applying inclusion and exclusion criteria**

148 For the studies included at the title and abstract level, we applied full text screening in  
149 two stages. Stage 1 was a rapid screening carried out by one reviewer to verify if the  
150 mortality outcome was reported by each sex. Stage 2 was applied to the studies included  
151 from stage 1, where we applied the remaining inclusion and exclusion criteria and this  
152 was done by two reviewers independently. See Figure 1.

### 153 **Screening studies: quality assurance process**

154 The inclusion/exclusion decisions made by the reviewers on the basis of titles and  
155 abstract were compared and agreement summarised using kappa statistics. We  
156 calculated the level of agreement between rates at this stage using Cohen's weighted  
157 kappa. We used weights that reflected a disagreement of 'maybe/yes' or 'maybe/no'  
158 carries less weight than 'yes/no'.  
159  
160  
161  
162  
163  
164  
165

166 Figure 1. Study screening flow

167

168

169

170

171

172

173

174

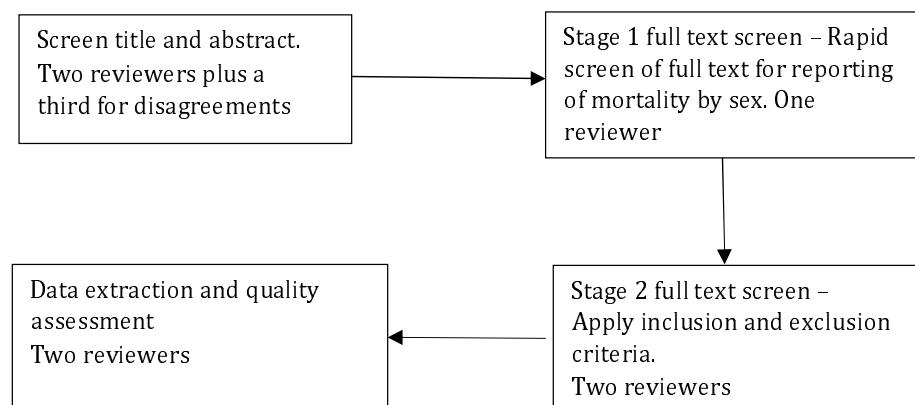

175

## 2.6 Critical appraisal and data extraction

176

177

178

179

180

We adapted the DistillerSR software<sup>10</sup> for data extraction to capture specific features for our study. The resulting tool was piloted and rectified before full extraction was performed by one reviewer. Two additional reviewers independently checked the extracted data. The full data extraction sheet and risk of bias tool are available in [Appendix 2 \(Tools used in screening, extraction, and quality assessment\)](#).

181

182

183

184

185

Studies where sex was the main exposure of interest were eligible for quality assessment using the “risk of bias in observational studies of exposures” (ROBINS-E) tool<sup>11,12</sup>, which scores studies to be of high, unclear and low risk of bias. Two reviewers independently assessed and checked eligible studies for quality, while a third reviewer resolved any disagreements between the first two reviewers.

186

## 2.7 Data analysis and synthesis

187

188

189

190

We carried out a narrative synthesis of the data, with two final summary tables. The first is for studies with sex as the main exposure of interest, and the second is for all studies, including those where sex was used as a variable for adjustment or a variable for summary statistics.

191

192

193

194

Where we had three or more studies with a similar sub-population e.g. admissions due to sepsis, we present their results graphically in a forest plot. As a summary report, we combined all studies with death numbers reported by sex, regardless of their variability and types of sub-populations.

195

196

We categorised the reported age groups to enable pooling of some studies that have a similar population and with the same age group, see Table 2.

197

All analyses were carried out in R version 4.1.1.

198 Table 2. Age groups for the included studies

|         |                                                               |
|---------|---------------------------------------------------------------|
| Group 1 | Age lower limit: 0 – 1 year<br>Age upper limit: 13 – 18 years |
| Group 2 | Age lower limit: 0 – 1 year<br>Age upper limit: 12 years      |
| Group 3 | Miscellaneous age ranges                                      |

199

## 200 2.8 Protocol changes

201 In our protocol we planned to summarise mortality after PICU discharge in addition to  
202 mortality in PICU. However, after summarising the variability in the studies, we  
203 concluded that additional information on out of PICU mortality would not confer  
204 additional knowledge due to the variability in the reporting of post-PICU mortality.

205

206

## 207 3 Results

208 Our search strategy identified 15,392 studies, of which 124 were eligible for inclusion, see  
209 Figure 2a. Overall, the 124 included studies had a total population of 866,620 children,  
210 379,733 (44%) females and 486,887 (56%) males. Of the 124 studies, 114 reported  
211 counts of deaths by males and females which give a population of 278,274 children for  
212 analysis, specifically involving 121,800 (44%) females and 156,474 males (56%). The  
213 number of deaths and mortality rate for females was 5,614 (4.61%), and for males 6,828  
214 (4.36%); thus there is a slightly higher proportion of deaths in females.

215

216 One reviewer screened the titles and abstracts of 14,028 studies, and a second  
217 reviewer blindly double checked all the included studies (Yes = 863, Maybe = 406)  
218 from this stage and a sample of the excluded ones, totalling 2,562 double checks. The  
219 level of agreement and weighted Kappa was 68.7% and 0.62 respectively. This was  
220 driven mostly by the answers being yes/no/maybe, where a 'maybe' answer was given  
221 if the abstract mentioned sex as a variable, but did not make clear if the mortality  
222 outcome was reported for each sex. This was also reflected in our exclusion reasons in  
223 Figure 2a, where we excluded 430 records out of 837 due lack of mortality numbers by  
224 sex. When we excluded the 'maybe' records, the level of agreement and kappa were  
225 88.5% and 0.69.

226

227 We were unable to retrieve the full text of 17 articles, and did not scrutinise the full text of  
228 the non-English articles. The non-English records were 44 out of 837 (5.3%) therefore  
229 excluded as they comprised <20% of the full text records eligible for screening. We  
230 retrieved the full text for the remaining 776 studies and applied the exclusion criteria in  
231 two stages. In stage 1, one reviewer rapidly assessed if the mortality outcome was

232 reported by sex. In stage 2, a reviewer applied the exclusion criteria to the remaining 246  
233 studies, and a second reviewer checked this process. The remaining 124 studies were  
234 eligible for data extraction. See Figures [2a](#) and [2b](#) for full details.

### 235 **3.1 Tables of study summaries**

236 We report two types of summaries: first for all the studies meeting our extraction criteria  
237 (N = 124), and then for the subset of these studies where sex was the main exposure of  
238 interest and for which mortality was reported separately by sex (N = 5), see [Table 3](#). To  
239 simplify the reporting, we split the summary of the 124 studies into two parts depending  
240 on the mortality outcomes for males and females, see [Appendix 3 \(Summary tables of 124](#)  
241 [studies meeting the inclusion criteria\)](#)

242 We report the measures of association between sex and mortality in two ways. If the  
243 crude numbers of deaths were reported by sex, we calculated the measure of association  
244 in terms of odds ratios. Otherwise, we present the reported measure of association and  
245 list any adjustment variables if used.

246  
247 We report all the measures of association along with their confidence intervals (CIs), the  
248 type of sub-population, the age group, and the set of adjustment variables if used in each  
249 study. Only 18 of the 124 studies reported a measure of association of sex on mortality.  
250 All other studies reported numbers of deaths by sex as a summary statistic, see [Appendix](#)  
251 [3 \(Summary tables of 124 studies meeting the inclusion criteria\)](#). To summarise the  
252 results presented in these two tables, 68 studies reported higher female mortality, 6  
253 studies reported equal mortality, and 50 studies reported higher male mortality.

254



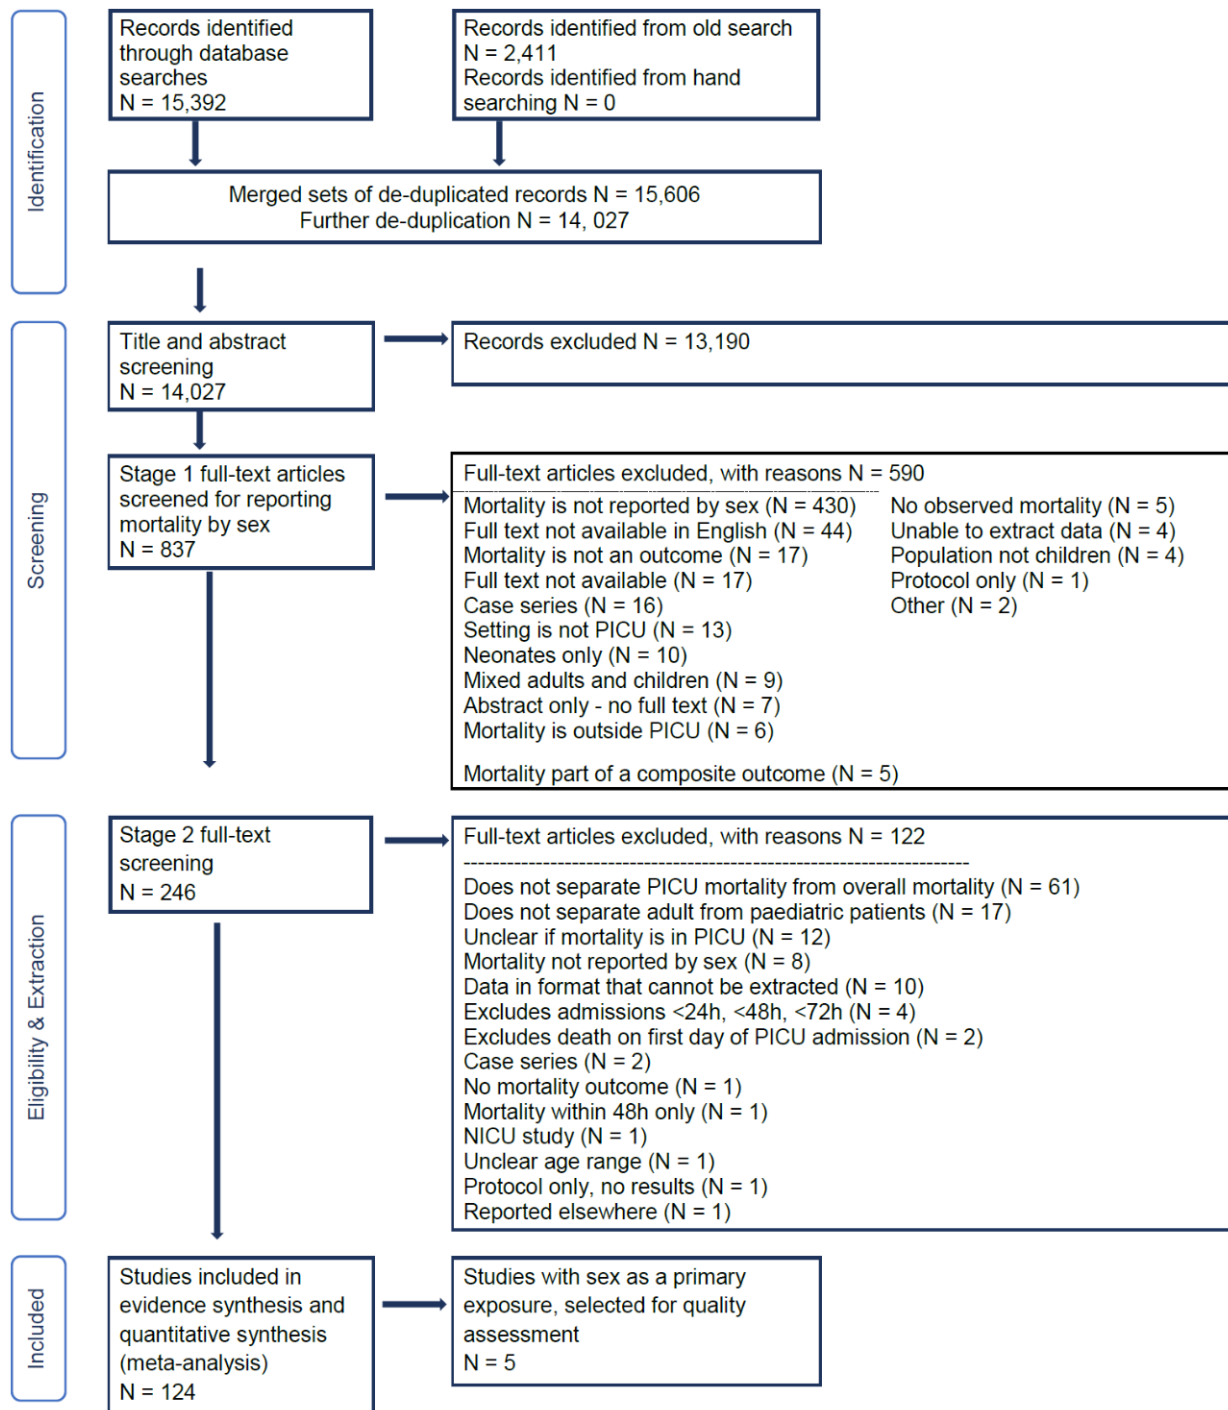

255

256

257

258

Figure 2a: PRISMA flowchart

Records identified from the old search are detailed in Appendix 1

259

260

261

262

263

Additions to the original PRISMA Flow Diagram, Copyright © 2020, Evidence Partners Inc., All Rights Reserved. Adapted from "Moher D, Liberati A, Tetzlaff J, Altman DG, The PRISMA Group (2009). Preferred Reporting Items for Systematic Reviews and Meta-Analyses: The PRISMA Statement. PLoS Med 6(7): e1000097. doi:10.1371/journal.pmed1000097" For more information, visit: [www.evidencepartners.com](http://www.evidencepartners.com), [www.prisma-statement.org](http://www.prisma-statement.org)

264 Figure 2b. Supplement to PRISMA flowchart

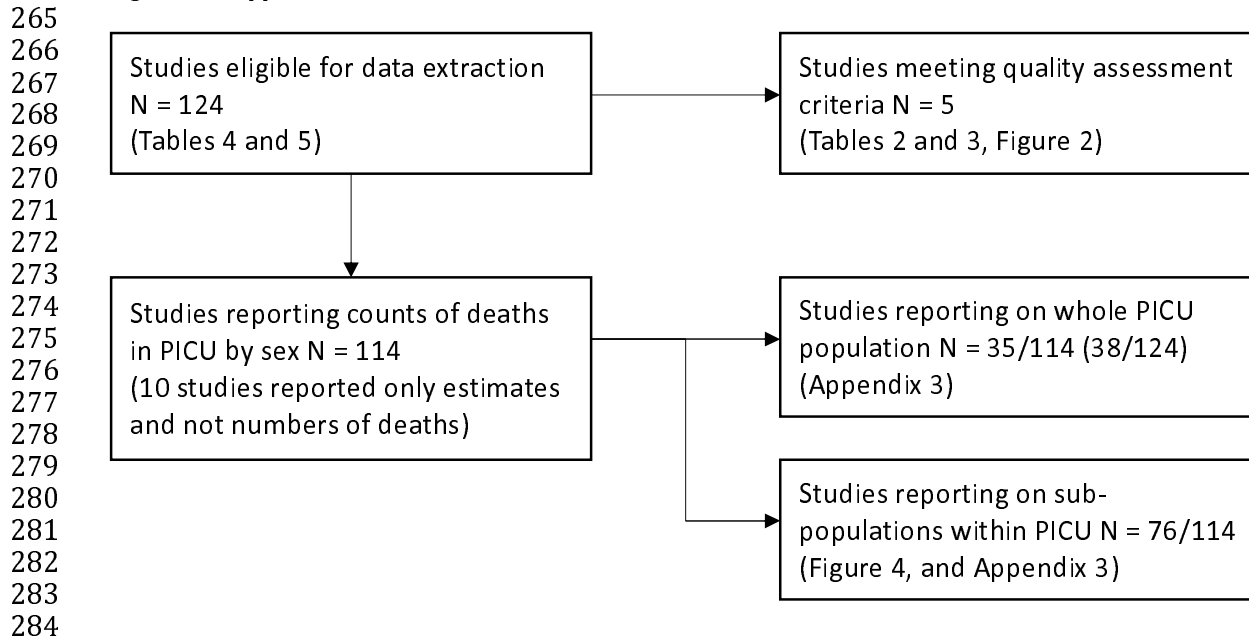

### 285 3.2 Sex as the main exposure

286 Overall we found eight studies addressing sex as the primary exposure. Of these eight,  
287 three were excluded because PICU mortality was not reported separately from other  
288 mortality outcomes<sup>13-15</sup>.

289 Table 3 summarises the five studies that met our criteria for quality assessment. There is  
290 considerable variability between these studies in terms of the age range, sub-population  
291 of PICU and baseline characteristics such as co-morbidities. Four of these studies did not  
292 include any score for severity of disease on admission; one reported the Paediatric Index  
293 of Mortality (PIM) score. Although all five studies specified sex as the primary exposure,  
294 in two of them PICU mortality was not the primary outcome. All studies reported a lower  
295 percentage of female admissions compared to males.

296 When we used the crude numbers to calculate the association between sex and mortality,  
297 three of the studies showed higher female mortality relative to males. In one of the two  
298 papers where male mortality was higher, the adjusted association reported by the  
299 authors showed the opposite, see Ghuman<sup>16</sup>.

300 Table 4 shows the quality assessment of the five studies using a modified version of the  
301 ROBINS-E tool. None of the studies achieved a high score for quality.

2 Table 3. Summary of the five studies where sex was the main exposure

| Author/Year                    | Mitra (2000)                                                                                     | Jeschke (2008)                                                                                                                          | Ghuman (2013)                                                                                                     | Esteban (2015)                                                                                                              | Lefevre (2017)                                                                                  |
|--------------------------------|--------------------------------------------------------------------------------------------------|-----------------------------------------------------------------------------------------------------------------------------------------|-------------------------------------------------------------------------------------------------------------------|-----------------------------------------------------------------------------------------------------------------------------|-------------------------------------------------------------------------------------------------|
| <b>PICU population</b>         | Patients with Diarrhoea                                                                          | Burns                                                                                                                                   | Sepsis                                                                                                            | Severe Health Conditions                                                                                                    | Sepsis                                                                                          |
| <b>Study dates</b>             | Nov 1992-Jun 1994                                                                                | 1996 - 2006                                                                                                                             | Jan 2006 - Dec 2008                                                                                               | Jan 2006 - Dec2008                                                                                                          | Jan 2000 - Dec 2013                                                                             |
| <b>Location</b>                | Bangladesh                                                                                       | USA                                                                                                                                     | USA                                                                                                               | Spain                                                                                                                       | Belgium                                                                                         |
| <b>No Sites</b>                | 1                                                                                                | 1                                                                                                                                       | 68                                                                                                                | 1                                                                                                                           | 1                                                                                               |
| <b>Clusters</b>                | Single centre                                                                                    | Single centre                                                                                                                           | ICUs/PICUs                                                                                                        | Single centre                                                                                                               | Single centre                                                                                   |
| <b>N Female/Male</b>           | 205/354                                                                                          | 76/113                                                                                                                                  | 272/303                                                                                                           | 233/212                                                                                                                     | 1087/1456                                                                                       |
| <b>Total</b>                   | 559                                                                                              | 189                                                                                                                                     | 575                                                                                                               | 445                                                                                                                         | 2543                                                                                            |
| <b>% female/male</b>           | 36.7/63.3                                                                                        | 40.2/59.8                                                                                                                               | 47.3/52.7                                                                                                         | 52.4/47.6                                                                                                                   | 42.5/57.5                                                                                       |
| <b>Age range</b>               | <5 years                                                                                         | 1-16 years                                                                                                                              | 2 - 7 years                                                                                                       | >16 years                                                                                                                   | 0 - 18 years                                                                                    |
| <b>Population description</b>  | Patients admitted to PICU with a history of diarrhoea                                            | Burns covering >40% total body surface area with third-degree of >10%, requiring a minimum harvesting of 1 donor site for skin grafting | Children aged 2-7 years defined the prepubertal group, and those aged 16-21 years defined the postpubertal group. | All patients admitted to PICU for more than 24h                                                                             | Prepubertal children admitted to the PICU of our hospital who were diagnosed with severe sepsis |
| <b>Method of recruitment</b>   | Chart review                                                                                     | Observational                                                                                                                           | Database analysis                                                                                                 | Chart review                                                                                                                | Chart review                                                                                    |
| <b>Baseline imbalances</b>     | Not reported                                                                                     | None reported                                                                                                                           | No imbalances                                                                                                     | Some differences in baseline diagnoses between males and females                                                            | No                                                                                              |
| <b>Race/Ethnicity</b>          | Not reported                                                                                     | Not reported                                                                                                                            | Not reported                                                                                                      | Not reported                                                                                                                | Not reported                                                                                    |
| <b>Severity of illness</b>     | None                                                                                             | None                                                                                                                                    | PIM                                                                                                               | None                                                                                                                        | PIM                                                                                             |
| <b>Comorbidities</b>           | Immunization status, malnutrition, sepsis                                                        | Sepsis, Inhalation injury                                                                                                               | Not reported                                                                                                      | Diagnoses on admission, Treatments given during PICU                                                                        | List of baseline comorbidities reported                                                         |
| <b>Other demographics</b>      | Weight for age Z score                                                                           | Main aim was assessment of nutritional status in PICU. A number of nutritional and body composition parameters were collected           | Age, MV, Dialysis                                                                                                 | None                                                                                                                        | Origin of sepsis                                                                                |
| <b>Comments</b>                | The calculated OR based on the total numbers provided is different to the OR of 1.8 in the study | All patients underwent the same nutritional treatment to a standardized protocol.                                                       |                                                                                                                   | The total numbers reported contain some adults. It is not clear if the mortality was calculated excluding the adults or not | Mortality reported in %, we calculated the crude numbers                                        |
| <b>LOS females/males</b>       | Not reported                                                                                     | Not reported                                                                                                                            | Median days 2.85/2.52 (pre-pubertal)                                                                              | Mean days >4 / >4                                                                                                           | No sex difference                                                                               |
| <b>Mortality outcome</b>       | Primary                                                                                          | Not primary                                                                                                                             | Primary                                                                                                           | Primary                                                                                                                     | Not primary                                                                                     |
| <b>Deaths Female/Male</b>      | 88/111                                                                                           | 6/7                                                                                                                                     | 27/33                                                                                                             | 13/25                                                                                                                       | 54/49                                                                                           |
| <b>Risk Difference (F - M)</b> | 0.12                                                                                             | 0.02                                                                                                                                    | -0.01                                                                                                             | -0.06                                                                                                                       | 0.02                                                                                            |
| <b>OR (F/M)</b>                | 1.65                                                                                             | 1.30                                                                                                                                    | 0.90                                                                                                              | 0.44                                                                                                                        | 1.52                                                                                            |
| <b>95% CI of the OR</b>        | 1.15 to 2.35                                                                                     | 0.42 to 4.02                                                                                                                            | 0.53 to 1.54                                                                                                      | 0.22 to 0.89                                                                                                                | 1.02 to 2.25                                                                                    |
| <b>Risk Ratio (F/M)</b>        | 1.37                                                                                             | 1.27                                                                                                                                    | 0.91                                                                                                              | 0.47                                                                                                                        | 1.49                                                                                            |
| <b>95% CI of Risk Ratio</b>    | 1.10 to 1.71                                                                                     | 0.46 to 3.65                                                                                                                            | 0.56 to 1.48                                                                                                      | 0.25 to 0.90                                                                                                                | 1.02 to 2.18                                                                                    |
| <b>Reported estimates</b>      | F/M OR 1.8                                                                                       | Not provided                                                                                                                            | F/M OR 1.08                                                                                                       | F/M OR 0.53                                                                                                                 | F/M OR 1.55                                                                                     |
| <b>Confidence intervals</b>    | 95% 1.2 to 2.7                                                                                   |                                                                                                                                         | 95% CI 0.6 to                                                                                                     | 95% CI 0.25 to                                                                                                              | 95% 1.04 to 2.32                                                                                |
| <b>Adjutment Variables</b>     | No adjustment                                                                                    |                                                                                                                                         | PIM2, PICU                                                                                                        | Age, Admission diagnosis, Nosocomial infection                                                                              |                                                                                                 |

### 304 3.3 Sex as a baseline variable

305 In addition to the five studies where sex was the primary exposure, we summarised  
 306 the results for a further 119 studies where the numbers of deaths for each sex were  
 307 reported as a summary statistic, or sex was used as a variable for adjustment when  
 308 studying mortality in PICU and estimated associations were reported for it. [Appendix 3](#)  
 309 [\(Summary tables of 124 studies meeting the inclusion criteria\)](#)  
 310  
 311

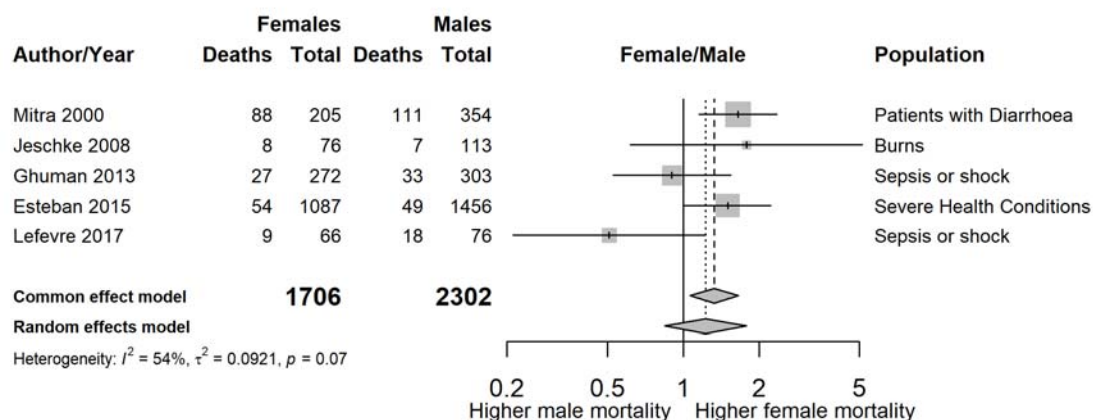

312  
 313 Figure 3. Forest plot showing the estimated unadjusted odds ratios of female to male  
 314 mortality by study, sorted by year of publication

315  
 316

### 317 3.4 Other secondary outcomes

318 Proportions of PICU admission by sex are reported in [Appendix 3 \(Summary](#)  
 319 [tables of 124 studies meeting the inclusion criteria\)](#). Out of 124 studies, 14  
 320 (11%) reported higher proportion of female admissions. However, the study by  
 321 Ghuman<sup>16</sup> reported on two age ranges showing a slightly higher admission rate  
 322 for females compared to males in the 16 to 21 years age category relative to  
 323 younger ages. As the former group is a mixture of adults and paediatric patients,  
 324 it fell outside the criteria of inclusion for this review.

325 For the length of stay outcome, 118 studies did not report this outcome by sex. For the  
 326 five studies meeting the quality assessment, we have reported a summary of this  
 327 outcome in Table 2.  
 328

9  
0

Table 4. Quality assessment of the five studies where sex was the main exposure, using the ROBINS-E tool

| Author                                         | Mitra <sup>17</sup>                            | Jeschke <sup>18</sup>                             | Ghuman <sup>16</sup>                              | Esteban <sup>19</sup>                             | Lefevre <sup>20</sup>                             |
|------------------------------------------------|------------------------------------------------|---------------------------------------------------|---------------------------------------------------|---------------------------------------------------|---------------------------------------------------|
| Year                                           | 2000                                           | 2008                                              | 2013                                              | 2015                                              | 2017                                              |
| Country                                        | Bangladesh                                     | USA                                               | USA                                               | Spain                                             | Belgium                                           |
| Exposed/Non Exposed Same Population            | Probably yes                                   | Definitely yes (low risk of bias)                 | Definitely yes (low risk of bias)                 | Probably yes                                      | Definitely yes (low risk of bias)                 |
| Confidence Of Assessment Of Exposure           | Definitely yes (low risk of bias)              | Definitely yes (low risk of bias)                 | Definitely yes (low risk of bias)                 | Definitely yes (low risk of bias)                 | Definitely yes (low risk of bias)                 |
| Confident Outcome Not Present At Start         | Definitely yes (low risk of bias)              | Definitely yes (low risk of bias)                 | Definitely yes (low risk of bias)                 | Definitely yes (low risk of bias)                 | Definitely yes (low risk of bias)                 |
| Adjusted For Baseline Variables                | Definitely no (high risk of bias)              | Mostly yes                                        | Mostly yes                                        | Mostly yes                                        | Mostly yes                                        |
| Assessment Presence/Absence Baseline Variables | Probably no                                    | Probably yes                                      | Probably yes                                      | Probably yes                                      | Probably yes                                      |
| Assessment Of Outcome                          | Definitely yes (low risk of bias)              | Definitely yes (low risk of bias)                 | Definitely yes (low risk of bias)                 | Definitely yes (low risk of bias)                 | Definitely yes (low risk of bias)                 |
| Follow up Cohorts Adequate                     | Probably yes                                   | Definitely yes (low risk of bias)                 | Definitely yes (low risk of bias)                 | Probably yes                                      | Probably yes                                      |
| Group Interventions Similar                    | Probably yes                                   | Probably yes                                      | Probably yes                                      | Probably yes                                      | Probably yes                                      |
| <b>Assessment of Bias</b>                      | High risk of bias for one or more key domains. | Unclear risk of bias for one or more key domains. | Unclear risk of bias for one or more key domains. | Unclear risk of bias for one or more key domains. | Unclear risk of bias for one or more key domains. |

1

### 332 3.5 Variability in sub-populations

333 We found wide variability between the studies with regards to the sub-  
334 populations of PICU and their age range. It was therefore difficult to combine the  
335 results. Figures 3 and 4 summarise the numbers and proportions of population  
336 types we found in the studies which are summarised in Table 3 and Appendix 3  
337 respectively.

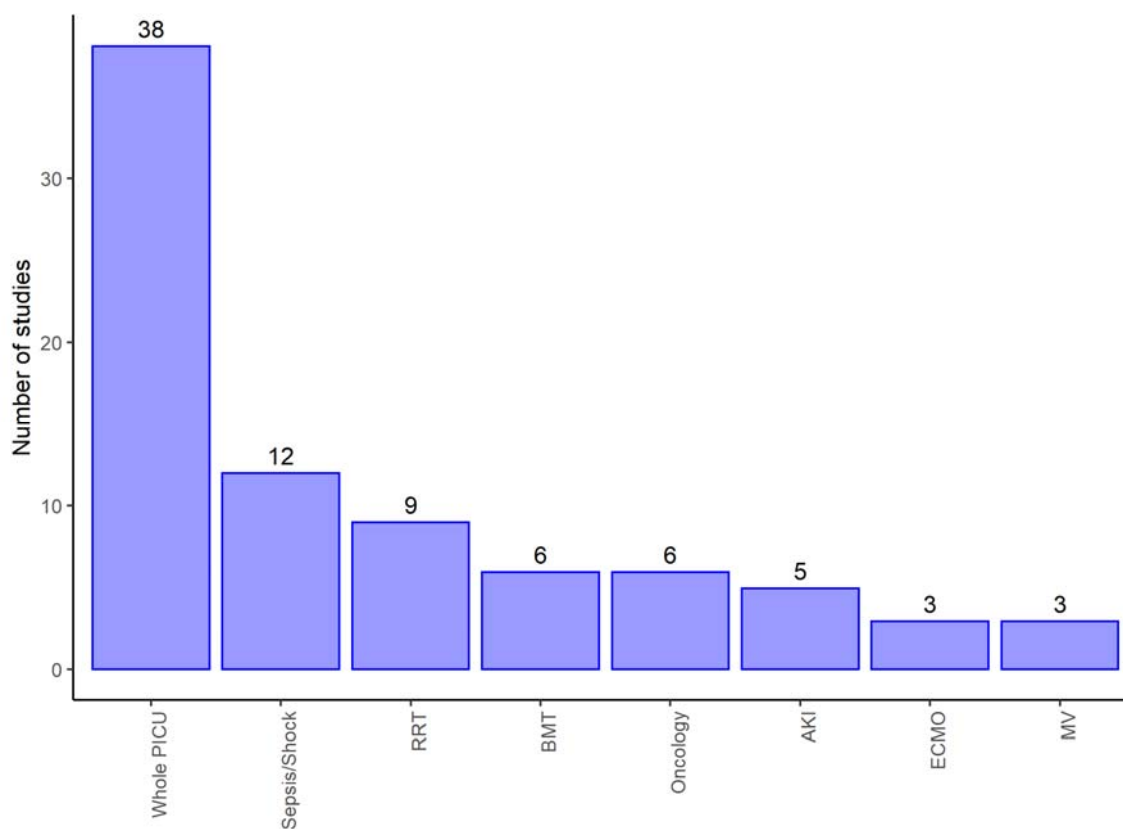

338  
339 Figure 4. Number of studies by type of PICU admission of the reported studies  
340 summarised in Appendix 3

341 Displays populations reported by at least three of the studies selected for extraction and make up 82/124  
342 (66%) of these studies, and 72/124 (58%) reported counts of death by sex

343 RRT: Renal replacement therapy; BMT: Bone marrow transplant; AKI: Acute kidney injury; ECMO: Extra  
344 corporeal membrane oxygenation; MV: Mechanical ventilation

### 346 3.6 Publication bias

347 As far as we could assess, we found very little evidence for publication bias in the  
348 reporting of studies. Figure 5 shows a funnel plot of the 28 studies of whole PICU  
349 population categorised into age group 1, showing negligible asymmetry. We focus  
350 on this subgroup of results because they should be more homogeneous in effect  
351 estimates.

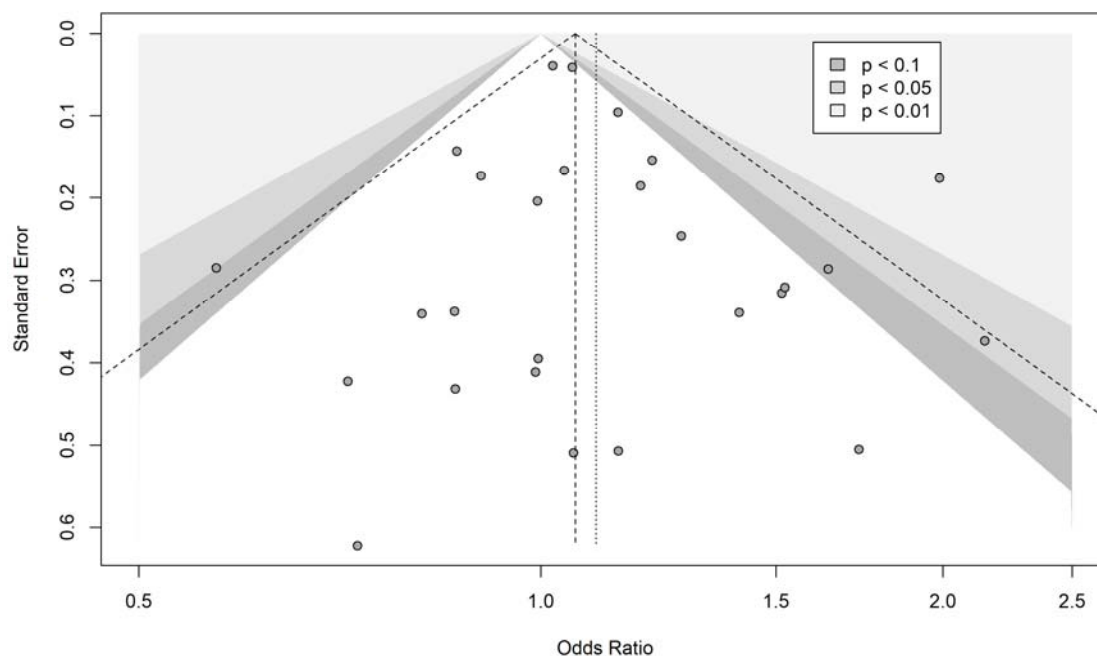

352

353

Figure 5. Funnel plot of 27 studies reporting on whole PICU population and belong to age group 1

354

### 3.7 Summary of studies reporting counts of death

355

356

357

358

Figure 3 shows a summary plot of the crude odds ratios for the five studies where sex was the primary exposure. We have not combined the estimates due to the large variability ( $I^2 = 53.6\%$  [0.0% to 82.9%]) in sub-populations and age ranges between the studies.

359

360

361

362

363

364

From the remaining 119 studies that do not meet the quality assessment criteria, we report a summary plot of the estimated odds ratios of female to male mortality for the 27 studies which included whole PICU populations in age group 1 (see Figure 6). The unadjusted pooled OR of female to male mortality is 1.06 for the common (i.e. fixed) effect model, and 1.10 for the random effects model, with no strong evidence of heterogeneity ( $I^2 = 29\%$ ).

365

366

367

Additional plots of sub-populations reported in three studies or more can be found in [Appendix 4 \(Additional plots for some of the reported sub-populations\)](#)

368

369

370

371

372

373

When we combined the 114 studies reporting death counts in a pooled estimate, regardless of their heterogeneity, we had data on 278,274 individuals and 12,442 deaths. The unadjusted pooled OR of female to male mortality was 1.11 [95% CI 1.07 to 1.15] for the common (i.e. fixed) effect model, and 1.14 [95% CI 1.04 to 1.26] for the random effects model. The  $I^2$  statistic reflecting heterogeneity between studies was 58.9% [95% range 49.9% to 66.6%] with a p value of

374 <0.001, indicating a high degree of heterogeneity. Hence these overall estimates  
 375 are reported only as an indication of the possible direction of the association.

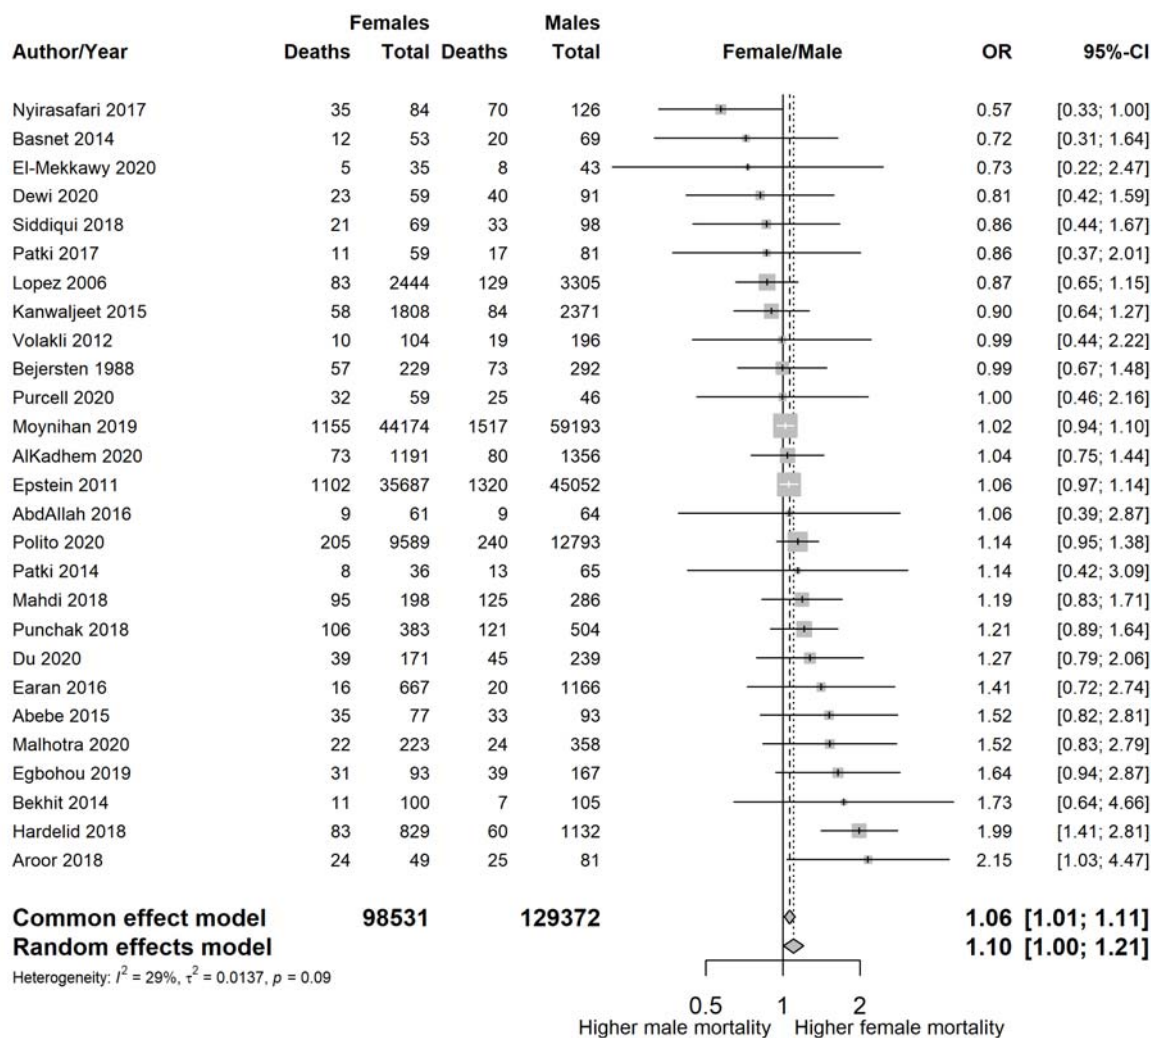

376  
 377 Figure 6. Estimated odds ratios of female to male mortality for 27 studies that include the whole  
 378 PICU population belonging to age group 1, sorted by the magnitude of the odds ratio  
 379

## 380 4 Discussion

381 Our systematic review shows that whilst more male children are admitted to  
 382 PICU, females tend to be more likely to die in PICU than males. Depending on the  
 383 study, female mortality rates ranged from lower (OR 0.14) to higher (OR 5.06)  
 384 than males, with a predominance (55%) of studies reporting higher female  
 385 mortality. A number of studies (5%) reported similar mortality rates between  
 386 sexes, in contrast to population mortality rates, where male mortality is higher.

387 Our review captured a wide range of studies in terms of design, size and variety  
 388 of PICU sub-populations. This resulted in the full text scrutiny of over 837 studies  
 389 and the inclusion of 124. However, we were only able to identify eight studies  
 390 that reported sex as the primary exposure and only five eligible for data



391 extraction. Nevertheless we were able to summarise the findings with a large  
392 number of participants, N = 866,620. For the majority of studies (n=119), the  
393 publication year was after 2000 reflecting the clinical and reporting progress  
394 made in paediatric intensive care data capture over the last two decades.

395 Another strength of this review is that there appears to be little publication bias  
396 since investigating the association between sex and mortality was not the  
397 primary aim of the majority of studies.

398 One of the limitations of our review is that it was not possible to combine the  
399 study estimates due to the large variability in the PICU sub-populations analysed,  
400 and the age ranges of the children included in these analyses. Where the  
401 association between sex and mortality was reported, and adjustments for  
402 confounders included, the variables used to statistically adjust the association  
403 between sex and mortality widely varied between studies. Studies reporting  
404 adjusted estimates for mortality did not justify the selection of variables used for  
405 their statistical adjustments and no two studies with adjusted mortality  
406 outcomes were comparable.

407 Furthermore, follow-up periods for reporting death in PICU were variable, with  
408 some studies reporting 7-day and 30-day outcomes in addition to the overall  
409 mortality. It was not clear if the 30-day outcomes were for deaths occurring in  
410 PICU or post discharge from PICU.

411 Other limitations are that we only considered deaths in PICU, and excluded  
412 studies on exclusively neonatal admissions.

413 We were only able to find five studies, none of good quality, where sex was  
414 addressed as the primary exposure. In some of these studies adjustment  
415 variables were used, but without rigorous justification for the set of variables  
416 used.

417 These findings show a paucity of evidence in relation to the effect of sex on  
418 mortality. Understanding the mechanisms for these differences can assist in  
419 improved identification of higher risk children and potentially improvements in  
420 the mortality scoring systems used in PICU. A robust and sufficiently large study  
421 of PICU mortality in children is needed, where confounder identification and  
422 selection is carried out methodically to enable a mechanistic study of the  
423 relationship between sex and mortality in PICU.

## 424 **5 Conclusion**

425 The evidence we have collected shows that, among children admitted to PICU,  
426 females appear to have a higher risk of PICU mortality than males, in contrast to a  
427 male excess of admissions to PICU. Investigating the reasons for these disparities

428 may help improve insights into the needs of specific populations of critically ill  
429 children.

430

431 The number of children contributing to this review was large but the quality of  
432 the reporting studies were average or poor. Pooling of estimates was not possible  
433 in general due to their variability in design.

434

435

## 436 **Supporting information**

437 Appendix 1: Search Terms and Search Results

438 Appendix 2: Tools used in screening, extraction, and quality assessment

439 Appendix 3: Summary tables of 124 studies meeting the inclusion criteria

440 Appendix 4: Additional plots for some of the reported sub-populations

441 PRISMA-P checklist

## References

1. Royal College of Paediatrics and Child Health, CHR-UK Programme of Work at the MRC Centre of Epidemiology for Child Health, & University College London Institute of Child Health. *Child Health Reviews UK - Overview of child deaths in the four UK countries*. [https://www.rcpch.ac.uk/sites/default/files/CHR-UK\\_-\\_Retrospective\\_Epidemiological\\_Review\\_of\\_All-cause\\_Mortality\\_in\\_CYP.pdf](https://www.rcpch.ac.uk/sites/default/files/CHR-UK_-_Retrospective_Epidemiological_Review_of_All-cause_Mortality_in_CYP.pdf) (2013).
2. United Nations, Department of Economic and Social Affairs, Population Division. Sex Differentials in Childhood Mortality. <http://www.un.org/esa/population/publications/SexDifChildMort/SexDifferentialsChildhoodMortality.pdf> (2011).
3. Paediatric Intensive Care Audit Network. *PICANet 2019 Annual Report Summary*. [https://www.picanet.org.uk/wp-content/uploads/sites/25/2019/12/PICANet-2019-Annual-Report-Summary\\_v1.0.pdf](https://www.picanet.org.uk/wp-content/uploads/sites/25/2019/12/PICANet-2019-Annual-Report-Summary_v1.0.pdf) (2019).
4. Ramnarayan, P., Craig, F., Petros, A. & Pierce, C. Characteristics of deaths occurring in hospitalised children: changing trends. *Journal of Medical Ethics* **33**, 255–260 (2007).
5. Almossawi, O., O'Brien, S., Parslow, R., Nadel, S. & Palla, L. A study of sex difference in infant mortality in UK paediatric intensive care admissions over an 11-year period. *Sci Rep* **11**, 21838 (2021).
6. Almossawi, O. *et al.* Investigating differences in gender mortality for children admitted to UK critical care units. *UCL Great Ormond Street Institute of Child Health* <https://www.ucl.ac.uk/child-health/research/population-policy-and-practice-research-and-teaching-department/cenb-clinical-10> (2018).
7. Almossawi, O., Friend, A., Palla, L., Feltbower, R. & Stavola, B. D. Is there a sex difference in mortality rates for deaths occurring in paediatric intensive care units? Systematic literature review protocol. *BMJ Open* **11**, e046794 (2021).
8. Shamseer, L. *et al.* Preferred reporting items for systematic review and meta-analysis protocols (PRISMA-P) 2015: Elaboration and explanation. *BMJ* **349**, g7647–g7647 (2015).
9. Westreich, D. & Greenland, S. The table 2 fallacy: presenting and interpreting confounder and modifier coefficients. *Am J Epidemiol* **177**, 292–298 (2013).
10. Evidence Partners. *DistillerSR. Version 2.35*. (2021).
11. Bero, L. *et al.* The risk of bias in observational studies of exposures (ROBINS-E) tool: Concerns arising from application to observational studies of exposures. *Systematic Reviews* **7**, 242 (2018).
12. Lansche, J., JW, B. & GH, G. Tool to Assess Risk of Bias in Cohort Studies. 7.
13. Morrison, W. E., Arbelaez, J. J., Fackler, J. C., De Maio, A. & Paidas, C. N. Gender and age effects on outcome after pediatric traumatic brain injury\*: *Pediatric Critical Care Medicine* **5**, 145–151 (2004).
14. Phelan, H. A. *et al.* Use of a Pediatric Cohort to Examine Gender and Sex Hormone Influences on Outcome After Trauma. *Journal of Trauma and Acute Care Surgery* **63**, 1127–1131 (2007).
15. Frigyesi, E. J., Andersson, P. & Frigyesi, A. Boys have better short-term and long-term survival rates after intensive care admissions than girls. *Acta Paediatrica* **106**, 1973–1978 (2017).
16. Ghuman, A. K., Newth, C. J. L. & Khemani, R. G. Impact of Gender on Sepsis Mortality and Severity of Illness for Prepubertal and Postpubertal Children. *The Journal of Pediatrics* **163**, 835–840.e1 (2013).
17. Mitra, A. K., Rahman, M. M. & Fuchs, G. J. Risk factors and gender differentials for death among children hospitalized with diarrhoea in Bangladesh. *J Health Popul Nutr* **18**, 151–156 (2000).
18. Jeschke, M. G. *et al.* Gender Differences in Pediatric Burn Patients: Does It Make a Difference? *Annals of Surgery* **248**, 126–136 (2008).
19. Esteban E., Bujaldon E., Esparza M., Jordan I., & Esteban M.E. Sex differences in children with severe health conditions: Causes of admission and mortality in a Pediatric Intensive Care Unit. *Am. J. Hum. Biol.* **27**, 613–619 (2015).
20. Lefèvre, N. *et al.* Sex Differences in Inflammatory Response and Acid-Base Balance in Prepubertal Children with Severe Sepsis. *Shock* **47**, 422–428 (2017).

## 6 Ethics and consent

Ethical approval is not required for this review as it synthesises data from existing studies. This manuscript is a part of a larger data linkage study, for which Ethical approval was granted by the London - City & East Research Ethics Committee, REC reference: 19/L0/1396, IRAS project ID: 214031.

## 7 Competing interests and sources of support

The authors declare no competing interests. OA is funded by an NIHR Fellowship grant, ICA-CDRF-2018-04-ST2-049. This project is sponsored by the joint Research and Development (R&D) at UCL Great Ormond Street Institute of Child Health.

## 8 Availability of data and materials

The datasets used and/or analysed during the current study are available from the corresponding author on reasonable request.

## 9 Patients and public involvement

This review is part of a larger research project with a Project Advisory Group (PAG). Members of the PAG have reviewed this manuscript. Details of the main project can be found on the UCL Child Informatics Group [Webpage](#).

## 10 Authors' contributions

OA conceived the idea for the literature review and drafted the protocol. BD and RF reviewed and refined the protocol aims and objectives. BD, KH, RF, AF, and LP reviewed, contributed to, and approved the manuscript for the protocol. OA conducted the literature search, AF and LP reviewed the search strategy and approved it. OA, AF, LP and SSI screened all the titles and abstracts and resolved conflicts from the title and abstracts review. For the included full text publications, OA and SOB extracted the data and completed the risk of bias tool then checked these steps. OA conducted the analysis and drafted the manuscript. All authors reviewed and approved the final draft.

## 11 Acknowledgements

We would like to thank members of the Project Advisory Group, Paul Saunders and Viki Ainsworth, for their contributions to the larger project and this manuscript in particular. We are grateful to our funder, the National Institute for Health Research, for their fellowship grant to Ofran Almassawi. This research was supported in part by the NIHR Great Ormond Street Hospital Biomedical Research Centre.

## 12 List of Abbreviations

**HES** Hospital Episode Statistics. 2

**ONS** Office of National Statistics. 2

**PICU** Paediatric Intensive Care Unit. 1–6, 8, 10, 22–25

**PIM** Paediatric Index of Mortality. 10

**PRISMA-P** Preferred Reporting Items for Systematic Reviews and Meta-Analyses  
Protocols. 3

**R&D** Research and Development. 38
